# Supplementary material for: Amphiphilic cationic cyclodextrin nanovesicles: a versatile cue for guiding cell adhesion
Source: Royal Society of Chemistry journal article supplement (doi:10.1039/d0na00623h), 2020-01-01
Supplement: d0na00623h1.pdf [file d0na00623h1.pdf]

## Electronic Supplementary Information

### Amphiphilic cationic cyclodextrin nanovesicles: a versatile cue for guiding cell adhesion

Francesco Valle<sup>a,b,†\*</sup>, Silvia Tortorella<sup>c,†</sup>, Angela Scala<sup>d</sup>, Annalaura Cordaro<sup>d,e</sup>, Marianna Barbalinardo<sup>a</sup>, Fabio Biscarini<sup>f</sup> and Antonino Mazzaglia<sup>e\*</sup>

<sup>a</sup>*Consiglio Nazionale delle Ricerche, Istituto per lo Studio dei Materiali Nanostrutturati (CNR-ISMN), Via P. Gobetti 101, 40129, Bologna, Italy*

<sup>b</sup>*Consorzio Interuniversitario per lo Sviluppo dei Sistemi a Grande Interfase (CSGI), Firenze, Italy*

<sup>c</sup>*Dipartimento di Chimica Industriale “Toso Montanari”, Università di Bologna “Alma Mater Studiorum”, Via Zamboni 33, 40126, Bologna, Italy*

<sup>d</sup>*Dipartimento di Scienze Chimiche, Biologiche, Farmaceutiche ed Ambientali, Università degli Studi di Messina, Viale F. Stagno D’Alcontres, 31, 98166, Messina, Italy*

<sup>e</sup>*Consiglio Nazionale delle Ricerche, Istituto per lo Studio dei Materiali Nanostrutturati (CNR-ISMN) c/o Dipartimento di Scienze Chimiche, Biologiche, Farmaceutiche ed Ambientali, Università degli Studi di Messina, Viale F. Stagno D’Alcontres, 31, 98166, Messina, Italy*

<sup>f</sup>*Università di Modena e Reggio Emilia, Dipartimento di Scienze della Vita, Via Campi 103, 41125 Modena, Italy and Istituto Italiano di Tecnologia, Center for Translational Neurophysiology. Via Fossato di Mortara 17-19, 4412, Ferrara, Italy*

<sup>†</sup>*ST and FV equally contributed*

Corresponding Authors:

Email Address: [francesco.valle@cnr.it](mailto:francesco.valle@cnr.it); [antonino.mazzaglia@cnr.it](mailto:antonino.mazzaglia@cnr.it)

MALDI-TOF analyses were performed on a Perseptive (Framingham, MA) Voyager STR instrument equipped with delayed extraction technology. Ions were formed by a pulsed UV laser beam (nitrogen laser,  $\lambda = 337$  nm) and accelerated through 24 kV. Samples were diluted in  $\text{CHCl}_3$  and mixed 1:1 v/v with the matrix solution obtained by dissolving 2,5-dihydroxybenzoic acid (DHB) in  $\text{CH}_3\text{OH}$  at a concentration of 30 mg/mL.

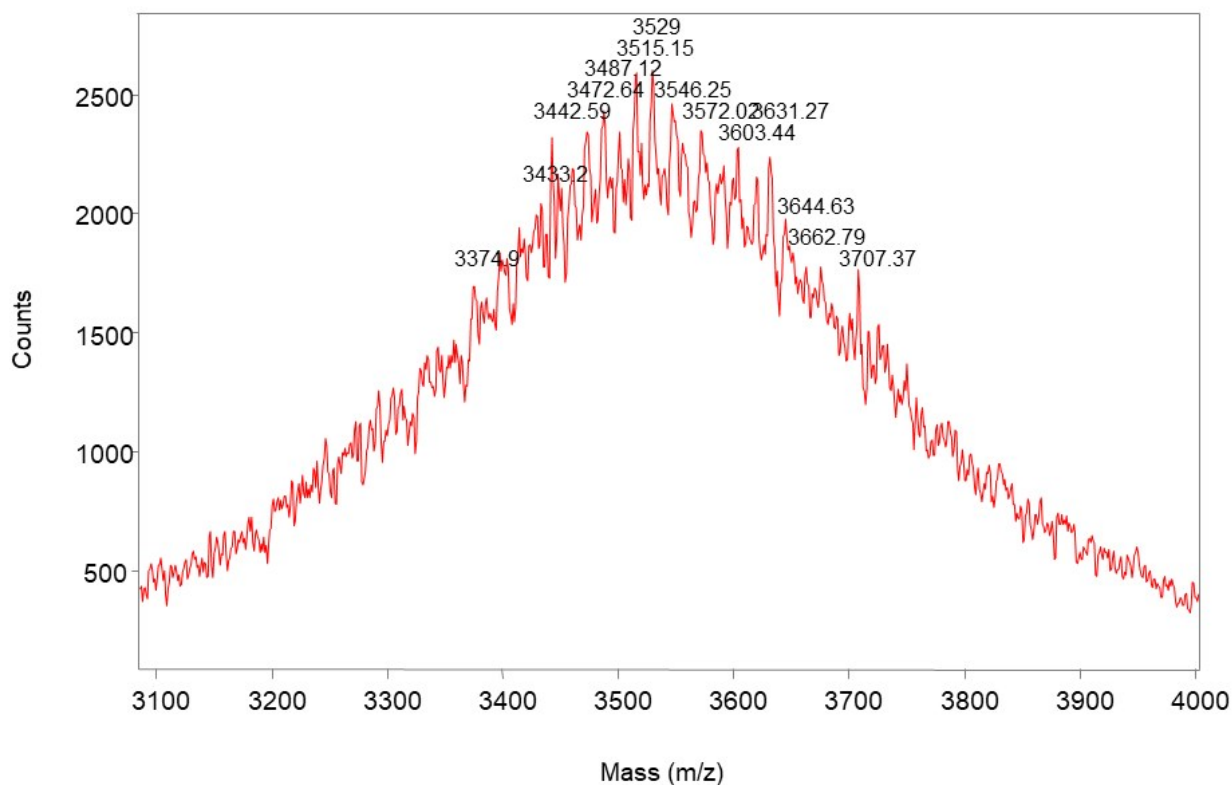

**Figure S1** MALDI-TOF spectrum of cationic aCD (SC16NH<sub>2</sub>), m/z (main peaks only): 3487.12 [M9EO] Na<sup>+</sup>; 3529 [M10EO] Na<sup>+</sup>; 3546.25 [M11EO]; 3572.02 [M11EO] Na<sup>+</sup>

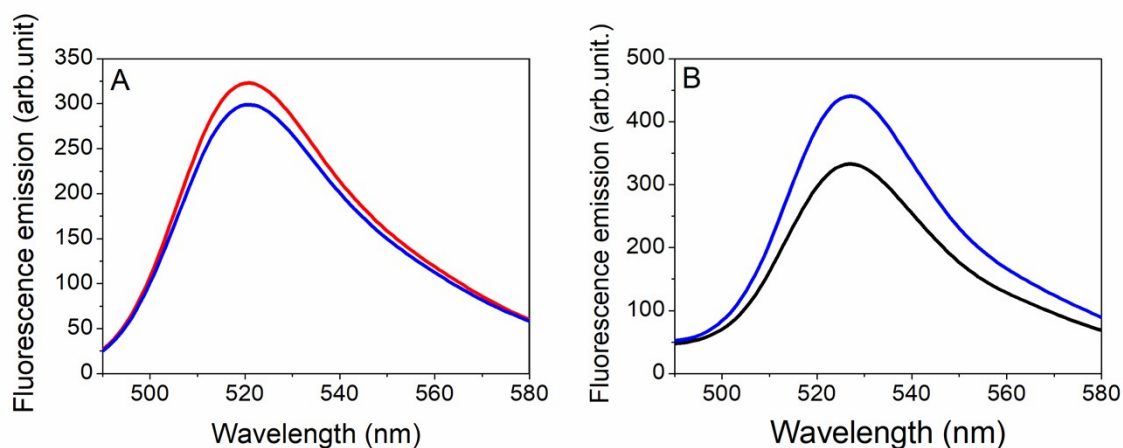

F

**figure S2:** Fluorescence emission spectra of a) FITC (red line,  $\lambda_{exc}=400$  nm) and b) aCD/FITC (black line,  $\lambda_{exc}=400$  nm,) in ultrapure water, free and in the presence of Triton X (2  $\mu$ L 0.1 % v/v, blue line). aCD/FITC were prepared at 20:1 molar ratio ([aCD]= 120  $\mu$ M, [FITC]= 6  $\mu$ M). Spectra were acquired at r.t.

**Table S1 :** Size distribution, PDI and  $\zeta$ -potential of aCD and aCD/FITC in physiological aqueous dispersion (NaCl 0.9% w/w) at pH $\approx$  6.3.

| System   | $D_H$ (nm $\pm$ SD)(%) <sup>a</sup> | PDI        | $\zeta$ (mV $\pm$ SD) |
|----------|-------------------------------------|------------|-----------------------|
| aCD      | 56 $\pm$ 34 (87)                    | $\geq 0.4$ | 32 $\pm$ 3            |
|          | 558 + 691 (13)                      |            |                       |
| aCD/FITC | 98 $\pm$ 59 (96) <sup>b</sup>       | $\geq 0.4$ | 38 + 3                |

<sup>a</sup> Size with corresponding intensity % distribution. <sup>b</sup> Microaggregates ( $\geq 1$   $\mu$ m) are present ( $\approx$  4%).

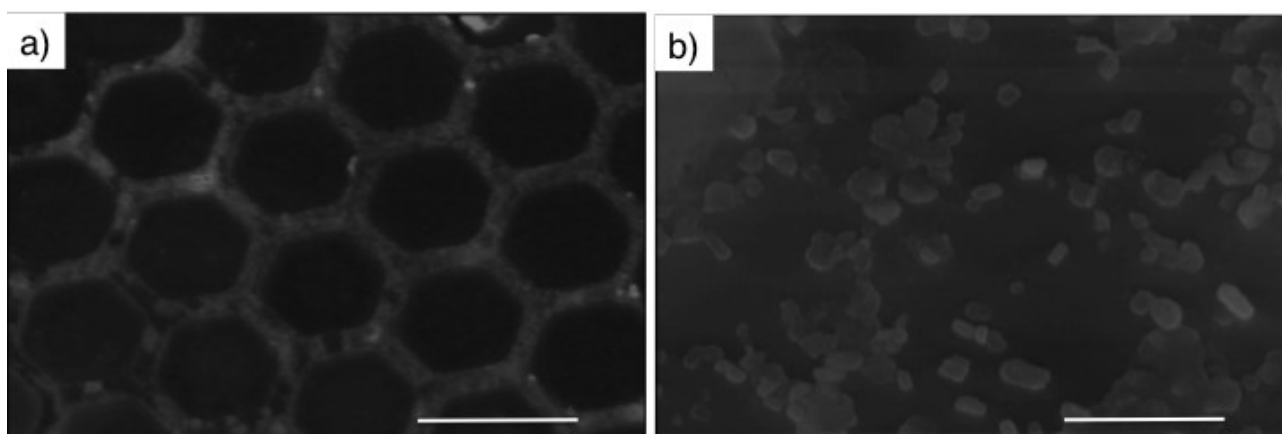

**Figure S3:** Scanning electron micrographs of the patterned aCD/FITC. In (a) and (b) are reported two different magnifications showing both the whole hexagonal pattern and the details of the aCD/FITC within the pattern features. The scale bars are respectively 75  $\mu$ m in (a) and 2.3  $\mu$ m in (b).

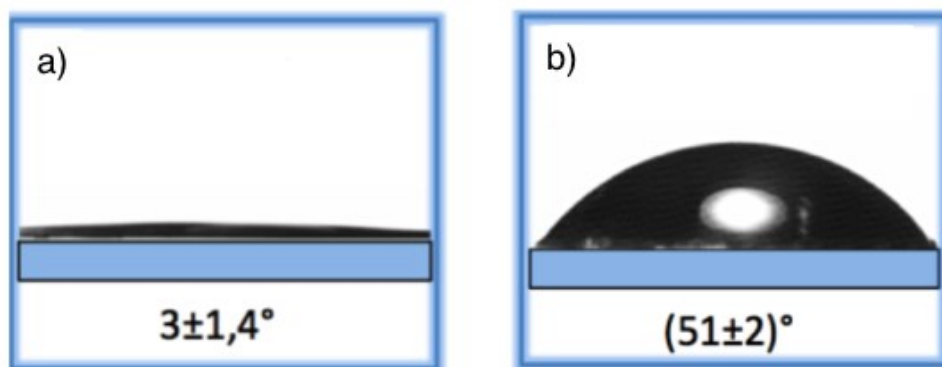

**Figure S4:** Contact angle of the glass coverslips prior (a) and after the exposition for one minute at O<sub>2</sub> plasma (b) . It is evident how the O<sub>2</sub> plasma treated glass (a) is more hydrophilic than the bare one (b)
